# Supplementary material for: pH sensitive smart gels of cetylpyridinium chloride in binary solvent mixtures: phase behaviour, structure and composition
Source: Royal Society of Chemistry journal article supplement (doi:10.1039/c5ra03478g), 2015-01-01

## Supporting information

Differential Scanning Calorimetry (DSC) experiments were performed to look at the thermoreversibility of the gel at pH 7. Three consecutive runs were performed starting from -70 to 35 °C (1<sup>st</sup> heating) and 35 °C to -70 °C (cooling) and then -70 to 35 °C (2<sup>nd</sup> heating) in the case of CPC in CH<sub>2</sub>Cl<sub>2</sub>:H<sub>2</sub>O.

From the DSC micrograph shown in Fig. S1, it has been observed that the gel showed endotherm on heating and exotherm on cooling. The melting peaks from the heating curve and the crystallization peaks from the cooling curve for CPC gel formed from 6 wt% CH<sub>2</sub>Cl<sub>2</sub>:H<sub>2</sub>O (3:1 v/v) were measured from DSC thermograms. The large hump formed is the super cooling peak (because of aqueous media /water as a solvent) due to the formation of ice and the peak at -11.79 °C is the sample peak.

**Fig. S1** DSC thermogram of the CPC gel formed from CH<sub>2</sub>Cl<sub>2</sub>:H<sub>2</sub>O [6 wt% CPC in the binary solvent mixture CH<sub>2</sub>Cl<sub>2</sub>:H<sub>2</sub>O (3 : 1 v/v)].

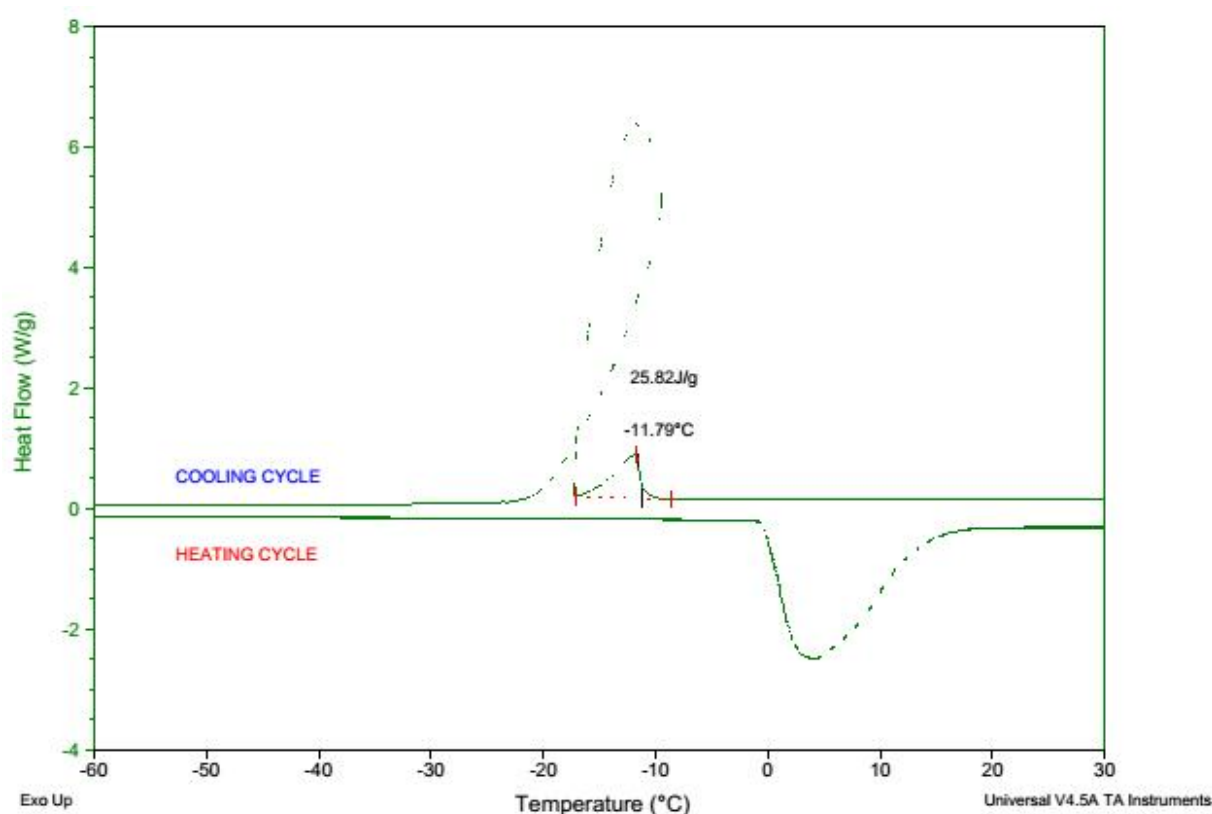

**Fig. S2** DSC thermogram of the CPC gel formed from  $\text{CHCl}_3:\text{H}_2\text{O}$  [6 wt% CPC in the binary solvent mixture  $\text{CH}_3\text{Cl}:\text{H}_2\text{O}$  (3 : 1 v/v)]. Three consecutive runs were performed starting from -70 to 60 °C (1<sup>st</sup> heating) and 60 °C to -70 °C (cooling) and then -70 to 60 °C (2<sup>nd</sup> heating) in the case of CPC in  $\text{CHCl}_3:\text{H}_2\text{O}$ .

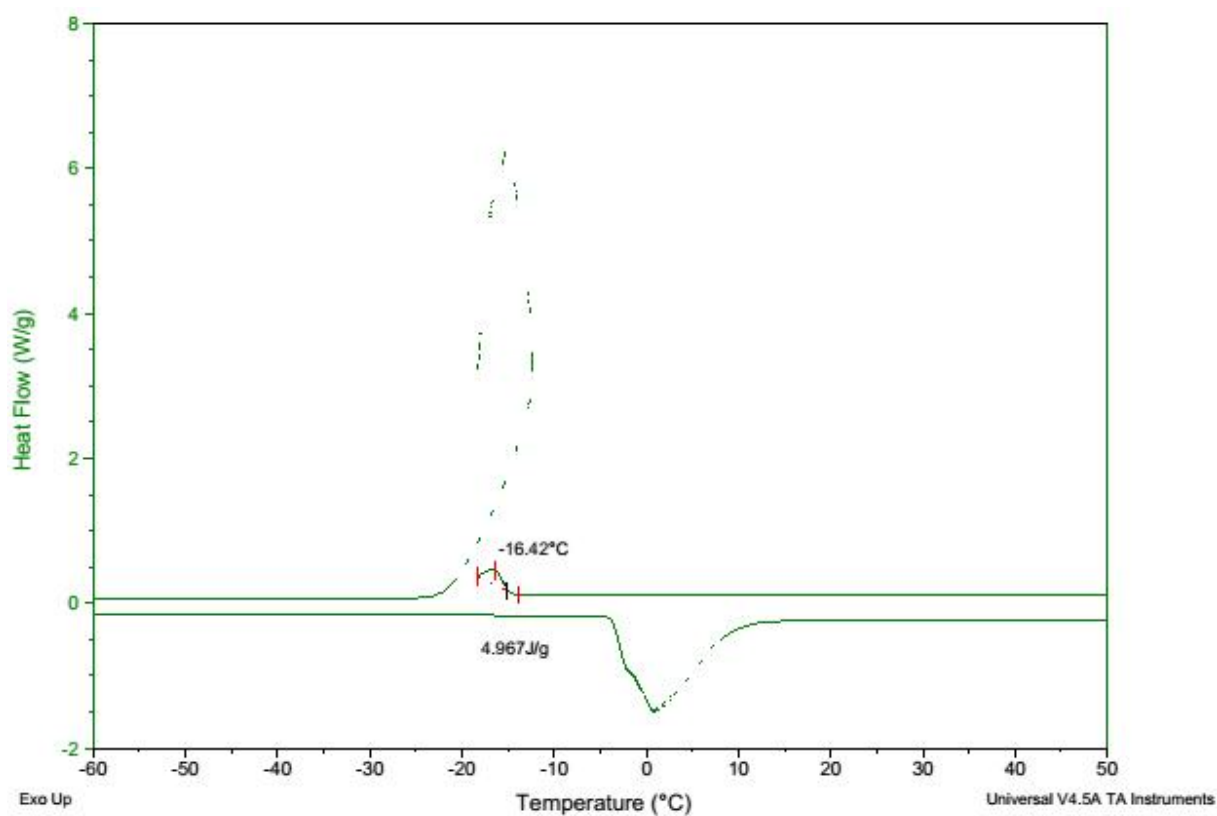

**Fig. S3** High resolution SEM images of the CPC gel formed from  $\text{CH}_2\text{Cl}_2$  (dielectric constant = 9.08) solvent showing extended fibrous structures [6 wt% CPC in the binary solvent mixture  $\text{CH}_2\text{Cl}_2:\text{H}_2\text{O}$  (3 : 1 v/v)].

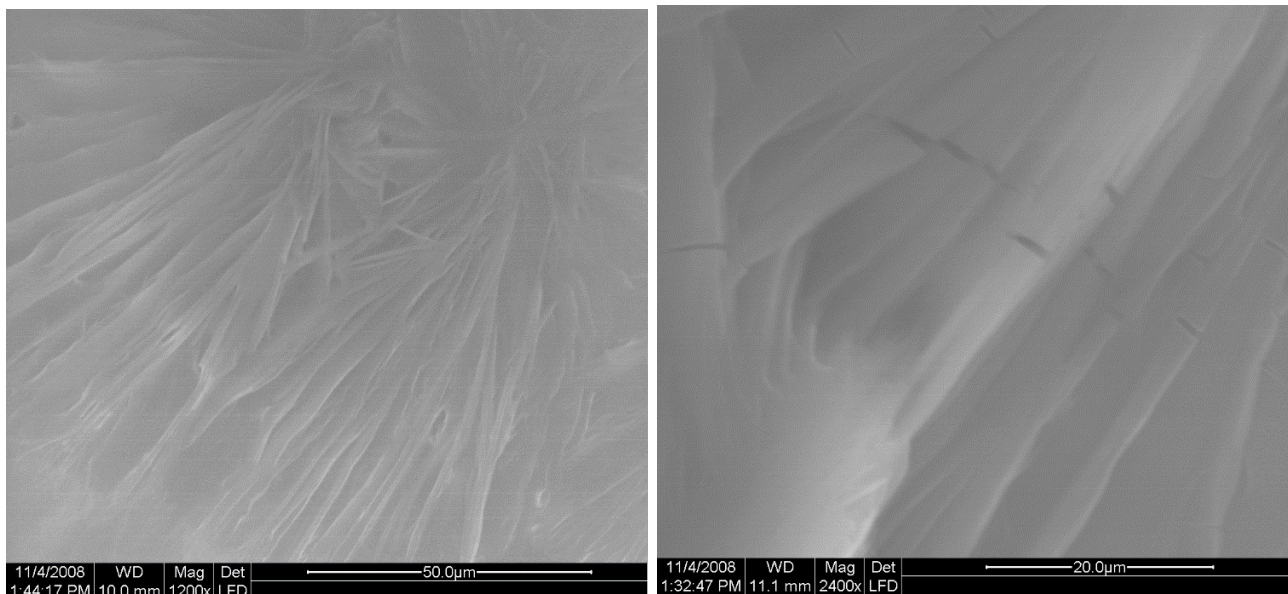

**Fig. S4** High resolution SEM images of the CPC gel formed from  $\text{CHCl}_3$  (dielectric constant = 4.81) solvent formed at pH 7 [6 wt% CPC in the binary solvent mixture  $\text{CHCl}_3:\text{H}_2\text{O}$  (3 : 1 v/v)].

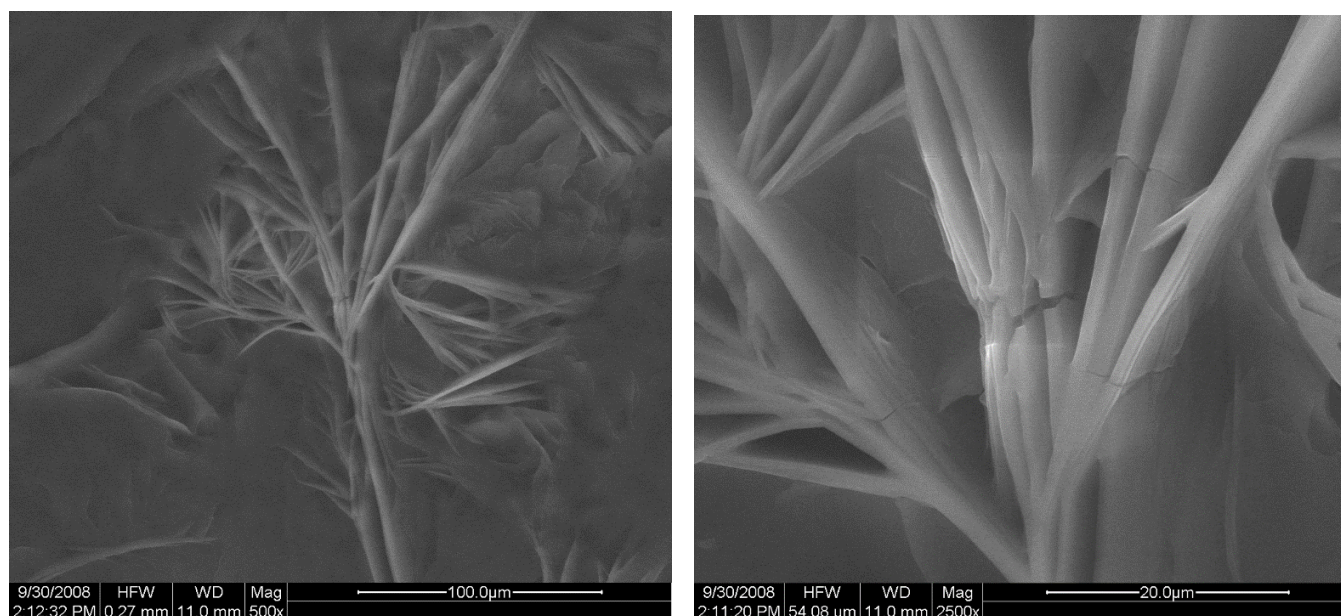

**Fig. S5** High resolution TEM images of the CPC gel formed from  $\text{CH}_2\text{Cl}_2$  (dielectric constant = 9.08) solvent showing extended fibrous twisted tubes with end-to-end connected structures [6 wt% CPC in the binary solvent mixture  $\text{CH}_2\text{Cl}_2$ : $\text{H}_2\text{O}$  (3 : 1 v/v)].

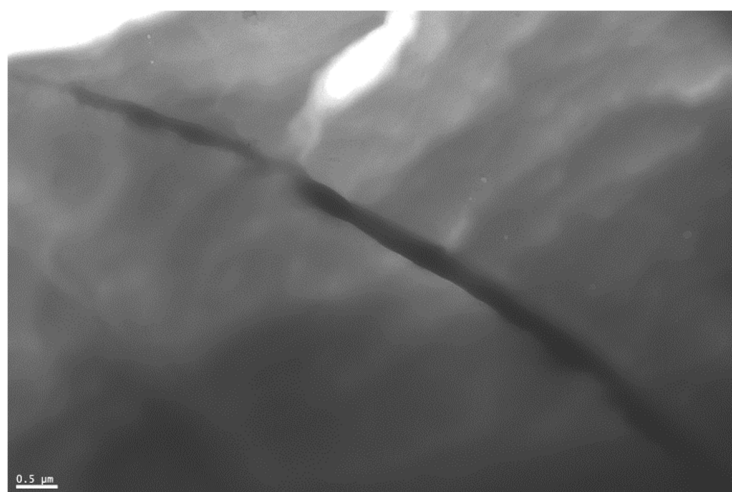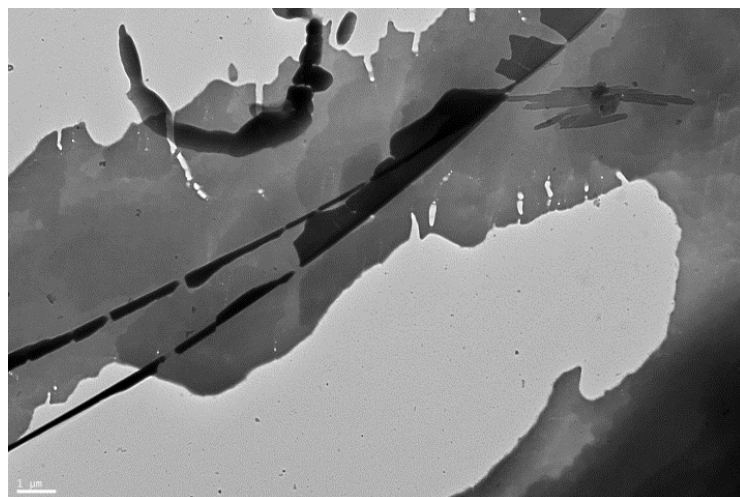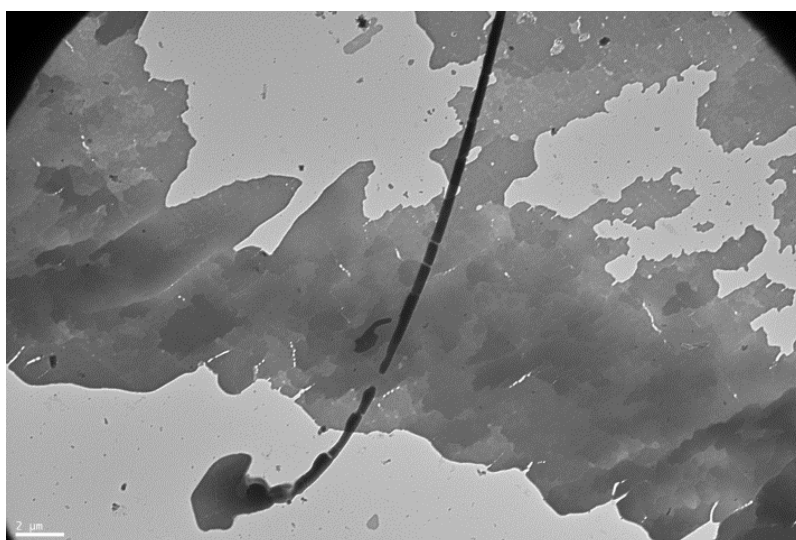

**Fig. S6.** Optical images of the gel phase of CPC gel in  $\text{CH}_2\text{Cl}_2:\text{H}_2\text{O}$  (transparent gel) under crossed polarizers (a) 4 X, (b) 4 X, (c) 10 X

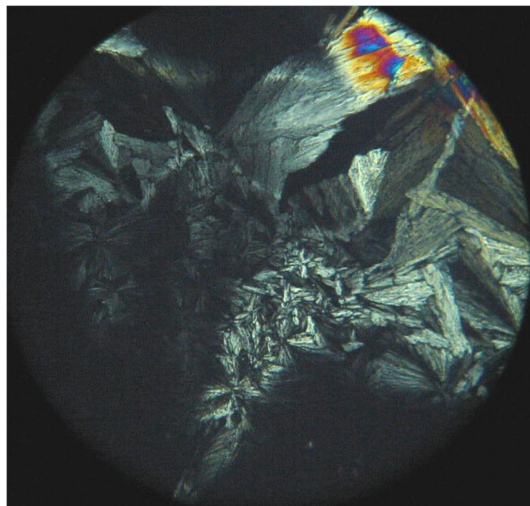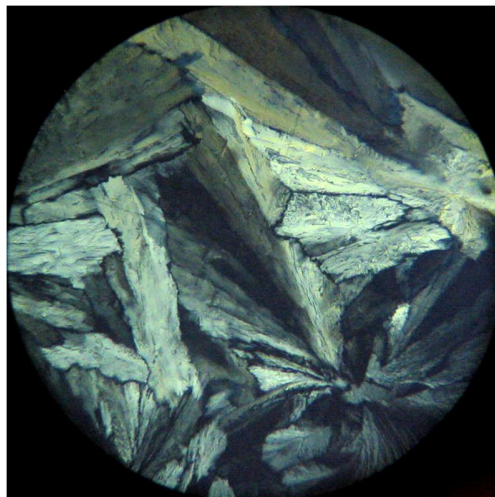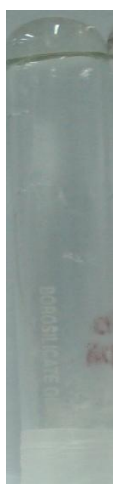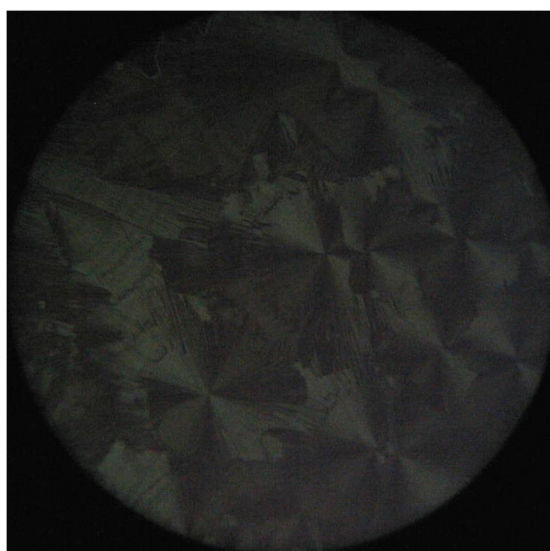



**Fig. S7** High resolution TEM images of the CPC gel formed from  $\text{CHCl}_3$  (dielectric constant = 4.81) solvent formed at pH 7 showing lamellar sheets folding into fibrous tubular structures with  $0.4 - 1.5 \mu\text{m}$  width [6 wt% CPC in the binary solvent mixture  $\text{CHCl}_3:\text{H}_2\text{O}$  (3 : 1 v/v)].

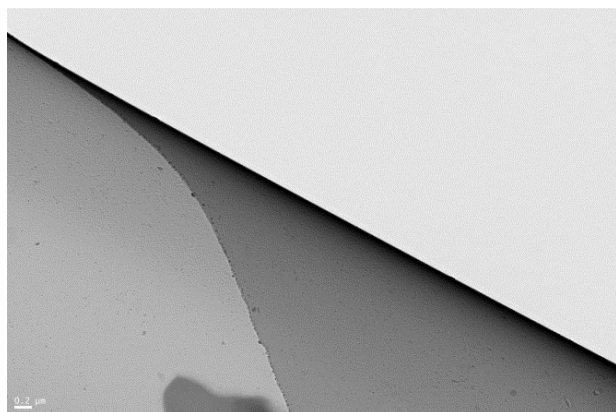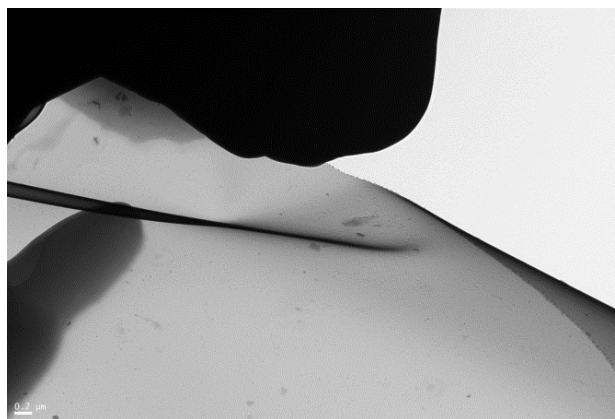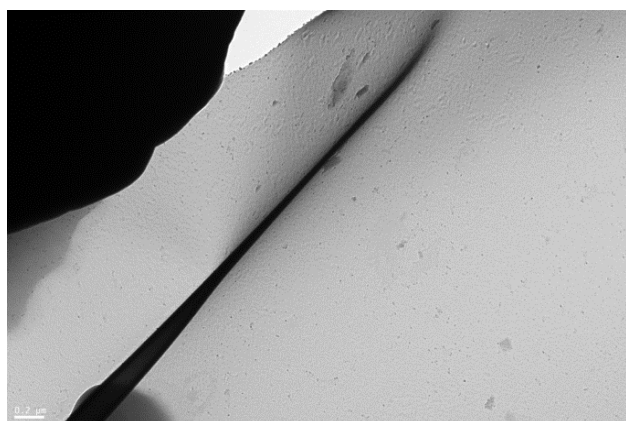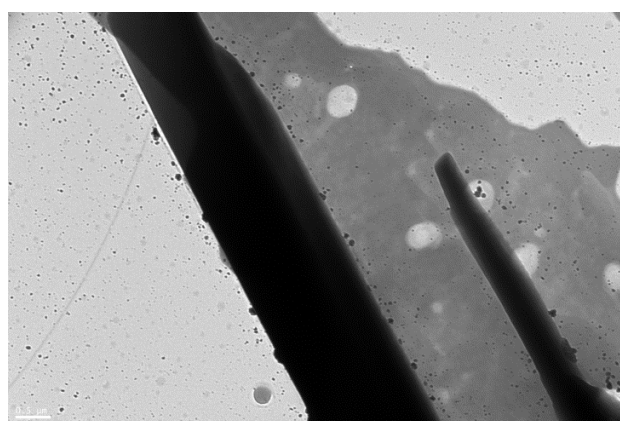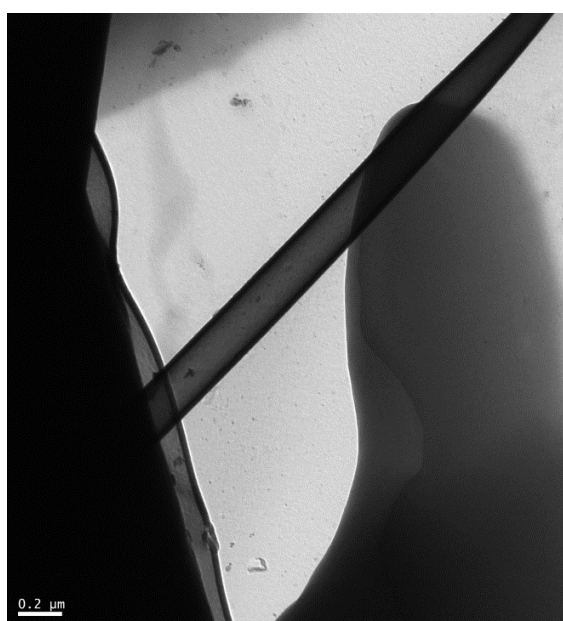

**Fig. S8** showing the effect of pH on CPC gel formation at 25 °C.

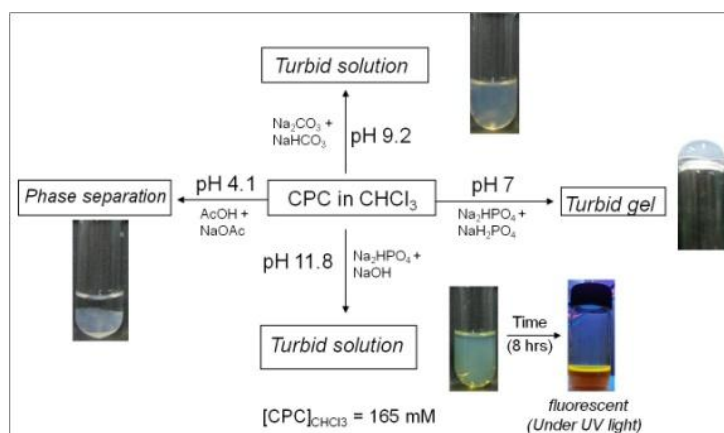

Supplement: c5ra03478g1.pdf [file c5ra03478g1.pdf]
